air swallowing or gastric inflation by ventilation *via* a mask prior to intubation.<sup>13</sup> No increase in vomiting was seen in tracheally intubated patients who would have received positive pressure mask ventilation prior to intubation. Nitrous oxide anesthesia does not affect bowel motility.<sup>14</sup>

We found no association between a history of recent upper respiratory infection and negative postoperative ear pressure. However, all admission tympanograms were normal, suggesting that preoperative eustachian tube function in this group was normal, despite a recent upper respiratory tract infection. A recent study has questioned any association between the use of nitrous oxide and development of postoperative nausea and vomiting in adults. Female gender, a younger age, and a previous history of nausea and vomiting were found to be associated with vomiting.<sup>1</sup> Although 60% of cases in this study were female, 41% were under age 12 yr and likely prepubertal. No association between female gender and vomiting was found.

In summary, we found no association between postoperative negative middle ear pressure and postoperative vomiting in outpatient pediatric patients after nitrous oxide and halothane anesthesia.

#### REFERENCES

1. Muir JJ, Warner MA, Offord KP, Buck CF, Harper JV, Kunkel SE: Role of nitrous oxide and other factors in postoperative nausea and vomiting: A randomized and blinded prospective study. *ANESTHESIOLOGY* 66:512-518, 1987
2. Lonie DS, Harper NJN: Nitrous oxide anaesthesia and vomiting. *Anaesthesia* 41:703-707, 1986
3. Perreault L, Normandin N, Planandon L, Blain R, Rousseau P, Girard M, Forget G: Middle ear pressure variations during nitrous oxide and oxygen anaesthesia. *Can Anaesth Soc J* 29:428-434, 1982
4. Patterson ME, Bartlett PC: Hearing impairment caused by intratympanic pressure changes during general anesthesia. *Laryngoscope* 85:399, 1976
5. Blackstock D, Gettes MA: Negative pressure in the middle ear in children after nitrous oxide anaesthesia. *Can Anaesth Soc J* 33:32-35, 1986
6. Andersen R, Krong K: Pain as a major cause of postoperative nausea. *Can Anaesth Soc J* 23:366-369, 1976
7. Booker PD, Chapman DH: Premedication in children undergoing day care surgery. *Br J Anaesth* 1083-1087, 1979
8. Wilton NCT, Burn JMB: Delayed vomiting after papavaretum in paediatric outpatient surgery. *Can Anaesth Soc J* 33:6:741-744, 1986
9. Lerman J, Eustis S, Smith DR: Effect of droperidol pretreatment on postanaesthetic vomiting in children undergoing strabismus surgery. *ANESTHESIOLOGY* 65:322-325, 1986
10. Hardy JF, Charest J, Girouard G, Lepage Y: Nausea and vomiting after strabismus surgery in preschool children. *Can Anaesth Soc J* 33:57-62, 1986
11. Palazzo MGA, Strunin L: Anaesthesia and emesis. I: Etiology. *Can Anaesth Soc J* 31:178-187, 1984
12. Bordley JE, Brookhauser PE, Tucker GF: Ear, Nose and Throat Disorders in Children. New York, Raven Press Books, 1986. pp 68-69
13. Eger EI II: Anaesthetic Uptake and Action. Baltimore, Williams and Wilkins, 1974, p 174
14. Giuffre M, Gross JB: The effects of nitrous oxide on postoperative bowel motility. *ANESTHESIOLOGY* 65:699-700, 1986

Anesthesiology  
68:291-295, 1988

## Improving Arterial Oxygenation during One-lung Ventilation

P. SLINGER, M.D., F.R.C.P.(C.),\* W. TRIOLET, M.D., F.R.C.P.(C.),\* J. WILSON, M.D., F.R.C.S.(C.)†

Maintaining adequate oxygenation during one-lung ventilation (OLV) for thoracic surgery is often a problem.<sup>1,2</sup> Studies have shown a significant incidence of PaO<sub>2</sub> values less than 70 mmHg in spite of high inspired oxygen concentrations (FI<sub>O<sub>2</sub></sub>) when the non-dependant

lung (ND-lung) is allowed to collapse.<sup>3</sup> Application of continuous positive airway pressure (CPAP) with an FI<sub>O<sub>2</sub></sub> of 1.0 to the ND-lung has been reported to be an effective method of improving PaO<sub>2</sub> during OLV without interrupting surgery and re-inflating the ND-lung.<sup>4</sup> However, subsequent human studies have not found application of CPAP to produce consistently satisfactory oxygenation.<sup>5,6</sup> Published human studies on CPAP during OLV have not detailed the method by which the CPAP was applied to the ND-lung. Allowing the ND-lung airway pressure (Paw) to fall to atmospheric pressure (Patm) for even a short period may result in collapse of small airways which will not be re-opened by clinically useful levels of CPAP.<sup>7</sup> However, application of CPAP 5 cm or more to the extremely compliant<sup>8</sup> ND-lung after the thorax is open results in a lung that stays at a high volume. This high volume combined with

\* Assistant Professor of Anaesthesia.

† Associate Professor of Surgery.

Received from the Departments of Anaesthesia and Thoracic Surgery, Montreal General Hospital and McGill University, Montreal, Quebec, Canada. Accepted for publication September 23, 1987. Presented in part at the Annual Meeting of the Canadian Anaesthetists Society; Calgary, Alberta, June, 1987.

Address reprint requests to Dr. Slinger: Department of Anaesthesia, Montreal General Hospital, 1650 Avenue Cedar, Montreal, Quebec, Canada H3G 1A4.

Key words: Anesthesia, thoracic. Anesthetic techniques, endobronchial.

TABLE 1. Patient Data Prior to One-lung Ventilation

| Patient | Group | Operation              | Age | Side | FEV  | FEV/VC | Pa <sub>O<sub>2</sub></sub> | 2 Lung-Pre |
|---------|-------|------------------------|-----|------|------|--------|-----------------------------|------------|
| 1       | A     | Hiatus hernia          | 61  | L    | 1.4  | .70    | 70                          | 233        |
| 2       | A     | Upper lobectomy        | 58  | R    | 1.25 | .68    | 66                          | 372        |
| 3       | B     | Middle wedge           | 68  | R    | 2.4  | .80    | 79                          | 330        |
| 4       | A     | Upper lobectomy        | 75  | L    | 1.7  | .79    | 105                         | 453        |
| 5       | B     | Pneumonectomy          | 62  | R    | 2.0  | .69    | 66                          | 253        |
| 6       | B     | Lower lobectomy        | 49  | R    | 2.95 | .83    | 81                          | 349        |
| 7       | A     | Upper lobectomy        | 64  | L    | 2.45 | .71    | 78                          | 375        |
| 8       | B     | Upper lobectomy        | 65  | L    | 1.0  | .47    | 64                          | 408        |
| 9       | A     | Pneumonectomy          | 79  | R    | 1.9  | .73    | 75                          | 386        |
| 10      | B     | Lower lobectomy        | 71  | R    | 2.0  | .69    | 100                         | 480        |
| 11      | A     | Lower/middle lobectomy | 66  | R    | 2.3  | .77    | 73                          | 386        |
| 12      | A     | Pneumonectomy          | 45  | R    | 4.7  | .85    | 62                          | 376        |
| 13      | A     | Lower lobectomy        | 62  | L    | 2.8  | .81    | 86                          | 397        |
| 14      | B     | Lower lobectomy        | 64  | R    | 2.5  | .68    | 91                          | 485        |
| 15      | A     | Upper lobectomy        | 56  | L    | 1.5  | .75    | 76                          | 315        |
| 16      | B     | Upper wedge            | 54  | L    | 2.2  | .76    | 70                          | 376        |
| 17      | B     | Upper lobectomy        | 63  | R    | 2.0  | .81    | 80                          | 392        |
| 18      | B     | Upper/middle lobectomy | 74  | R    | 1.15 | .62    | 83                          | 398        |
| 19      | A     | Upper lobectomy        | 71  | R    | 2.0  | .74    | 76                          | 262        |
| 20      | B     | Pneumonectomy          | 47  | L    | 3.6  | .83    | 90                          | 423        |

Side = side of operation; FEV<sub>1</sub> = preoperative forced expiratory volume in 1 s; FEV<sub>1</sub>/VC = FEV<sub>1</sub> to vital capacity ratio; Pa<sub>O<sub>2</sub></sub> = preoperative Pa<sub>O<sub>2</sub></sub> breathing air; 2 Lung-Pre = initial intraoperative Pa<sub>O<sub>2</sub></sub> in lateral position breathing 100% oxygen; wedge = pulmonary wedge resection.

the transmitted mediastinal motion from the ventilated (dependant) lung impedes surgery. Clinically, we have found that maintenance levels of CPAP less than 5 cm are often not enough to prevent progressive intraoperative atelectasis in the ND-lung and deteriorating Pa<sub>O<sub>2</sub></sub> values. This study was designed to determine if the method in which CPAP is applied effects the Pa<sub>O<sub>2</sub></sub> during OLV, and if modifying the method of CPAP application can improve subsequent arterial oxygenation.

#### MATERIALS AND METHODS

The study was approved by the Hospital Clinical Trials Committee, and informed consent was obtained from patients preoperatively. Twenty patients having elective thoracotomies were studied. FEV<sub>1</sub> and VC were measured and an arterial blood sample was drawn while the patients were supine and breathing air the evening before surgery.

Preoperative medication consisted of promethazine 50 mg and glycopyrrolate 0.2 mg im 1 h pre-induction. Following insertion of intravenous and intra-arterial cannulae, anesthesia was induced with fentanyl (5 µg/kg), sodium thiopental (2–3 mg/kg), and pancuronium (0.08 mg/kg) intravenously.

Anesthesia was maintained by the inhalation of isoflurane (0.5–1.5% inspired concentration) in oxygen. The isoflurane dose was titrated to maintain the systolic blood pressure within 20% of the pre-induction value.

After adequate relaxation, the patients' tracheas were intubated with a disposable, left endobronchial tube (Rusch® Canada, Scarborough, Ontario). Position of the endobronchial tube was checked by auscultation and re-verified by fiberoptic bronchoscopy in cases of uncertainty. Isolation of the lung on the side of surgery was verified by observing for underwater leak through the exhaust limb of the CPAP circuit during ventilation of the non-operative side. The patients' lungs were ventilated with a Nuffield 400 volume ventilator (Penlon®, Abingdon, England) using a tidal volume of 10 ml/kg for both one- and two-lung ventilation. The respiratory rate was adjusted to maintain an arterial CO<sub>2</sub> tension of 36 ± 2 mmHg. After insertion of an esophageal temperature probe and stethoscope, the patients were turned to the lateral decubitus position and the position of the endobronchial tube was re-verified. The initial intraoperative arterial blood gas sample (2-Lung Pre) was obtained with the patient in the lateral position during two-lung ventilation 15 min after induction of anesthesia. All blood gas samples were placed on ice and analyzed within 5 min using a Corning 165 pH/blood gas analyzer (Corning® Scientific Instruments, Medfield, MA).

After the thorax on the side of operation was opened, OLV was commenced and CPAP was applied to the ND-lung *via* a modified Mapleson-D circuit using an FI<sub>O<sub>2</sub></sub> of 1.0 and a flow of 1 l/min. The level of CPAP in the circuit was controlled by varying the depth of the underwater exhaust. An aneroid manometer previously calibrated against a water column was incorporated into the circuit to verify the level of CPAP. The patients were randomly allocated to one of two treatment sequences. In group A (10 patients), after a tidal volume inflation to an airway pressure (Paw) of 20 cm H<sub>2</sub>O, the ND-lung was allowed to deflate to 0 cm CPAP (Patm) for 5 min. Then, the CPAP was increased to 5 cm for 20 min (Method 1). Arterial blood gases were drawn 5 and 20 min after application of CPAP 5 cm. After 20 min of CPAP 5 cm (25 min of OLV), surgery was halted and the ND-lung re-inflated to a Paw of 30 cm H<sub>2</sub>O for a minimum of 30 s or until all visible atelectatic areas were re-expanded. The lung was then given a tidal volume inflation to Paw 20 cm and allowed to deflate to a CPAP of 2 cm H<sub>2</sub>O for 5 min. Then, the CPAP was increased to 5 cm H<sub>2</sub>O for 20 min (Method 2). Again, arterial blood gases were drawn 5 and 20 min after the application of CPAP 5 cm.

Group B (10 patients) followed an identical protocol, except that the sequence of CPAP applications was reversed (*i.e.*, Method 2 preceeded Method 1).

Surgery to the ND-lung continued during the periods of CPAP application by both methods. The entire experimental sequence was completed before ligation of

FIG. 1. Intraoperative PaO<sub>2</sub> changes in group A patients. Individual patient's values are connected by lines. 2 Lung-Pre = initial PaO<sub>2</sub>; OLV = one-lung ventilation; 2 Lung-Post = PaO<sub>2</sub> 15 min after resuming two-lung ventilation (15 min after ligation of pulmonary artery in pneumonectomies).

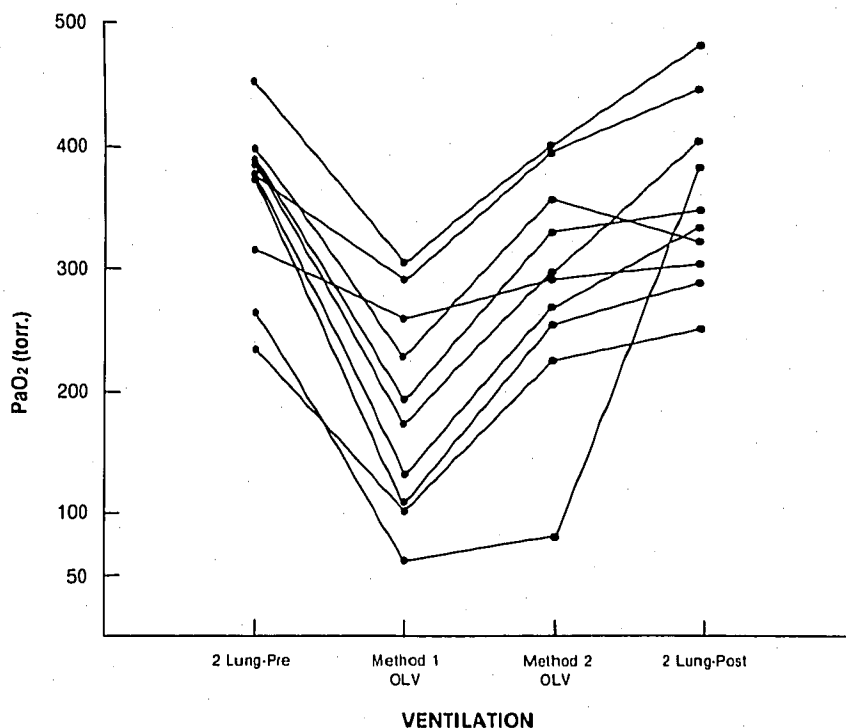

any major pulmonary vessels. A further intraoperative arterial blood gas was drawn 15 min after resumption of two-lung ventilation (2-Lung Post). In the pneumonectomy cases, this control blood gas was drawn 15 min after ligation of the pulmonary artery. Heart rate, systolic blood pressure, and esophageal temperature were recorded every 5 min throughout the surgery.

The similarity of the numerical data for group A and group B were assessed using a two-tailed *t* test for independent samples. The Shapiro-Wilk test was used to verify the normality of distribution of the PaO<sub>2</sub> results. The mean levels of PaO<sub>2</sub> during OLV were compared using a two-tailed *t* test for paired samples. Significant differences in the mean PaO<sub>2</sub> values attained by the two methods were identified using repeated measures analysis of covariance while controlling for the potentially confounding effect of baseline variables,<sup>‡</sup> namely: side of operation, FEV<sub>1</sub>/VC ratio and the initial intraoperative PaO<sub>2</sub>. *P* < 0.05 was considered significant.

### RESULTS

Demographic data are presented in table 1. The patients' ages ranged from 45–79 yr with a mean (±SD) of 62 ± 9 yr. The thoracotomy was on the left side in eight patients (5 group A, 3 group B) and on the right side in

12 patients (5 group A, 7 group B). There were no statistically significant differences between the means for group A and group B with respect to age, FEV<sub>1</sub>, FEV<sub>1</sub>/VC ratio, preoperative PaO<sub>2</sub>, or any intraoperative PaO<sub>2</sub> levels.

The individual changes in intraoperative PaO<sub>2</sub> values after 20 min of CPAP 5 cm during OLV (*i.e.*, 25 min of total OLV) are shown for group A and group B in figures 1 and 2, respectively. During OLV, only three of the study patients (1 group A, 2 group B) developed arterial hypoxemia to a PaO<sub>2</sub> level less than 70 mmHg. All of these hypoxemic episodes occurred during OLV with Method 1 CPAP.

Significant correlation coefficients were found between the FEV<sub>1</sub> and the FEV<sub>1</sub>/VC ratio (*r* = .698), the FEV<sub>1</sub> and the patient's age (*r* = -.611), and the preoperative PaO<sub>2</sub> and the 2-Lung Pre PaO<sub>2</sub> (*r* = .605). The analyses based on all continuous covariates showed the redundancy of three of these covariates, and only the most explanatory ones were retained for further analysis, namely: FEV<sub>1</sub>/VC ratio and 2-Lung Pre PaO<sub>2</sub>. In addition, side of operation and group were retained in further statistical analyses.

The assumption of normality was verified for all 5- and 20-min PaO<sub>2</sub> results. The mean (±SD) PaO<sub>2</sub> values for groups A and B combined during OLV with CPAP 5 cm using Method 1 were: 202 ± 97 mmHg at 5 min and 187 ± 92 mmHg at 20 min. For Method 2, the 5- and 20-min PaO<sub>2</sub> results were: 329 ± 95 mmHg and 294

<sup>‡</sup> SAS user's guide: Statistics version 5. Cary, SAS Institute, 1985, p 433.

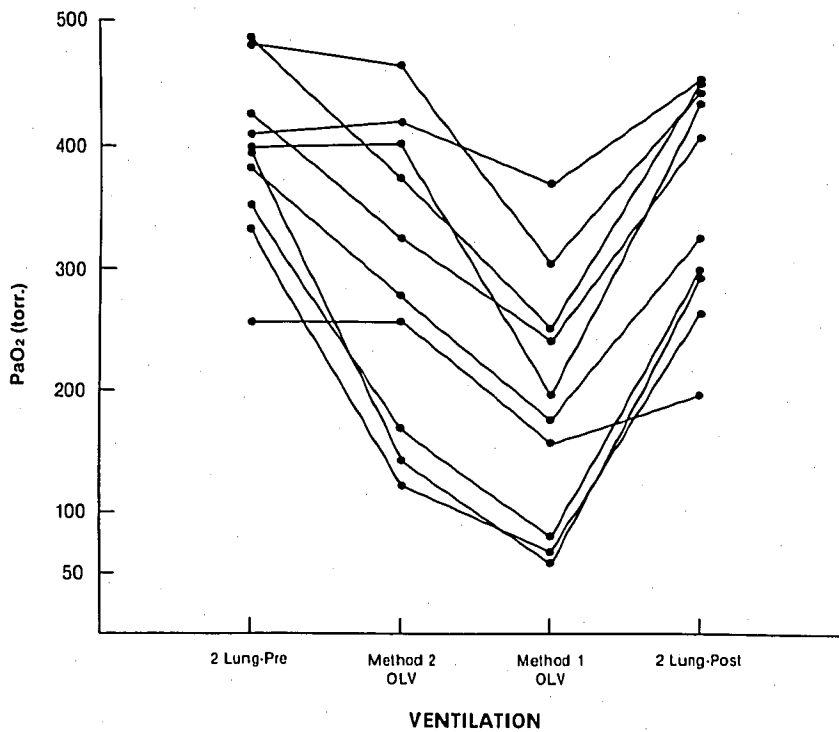

FIG. 2. Intraoperative PaO<sub>2</sub> changes for group B patients.

$\pm 106$  mmHg, respectively ( $P < .001$  for both 5- and 20-min values).

Repeated measures analysis of covariance demonstrated that Method 2 resulted in significantly better PaO<sub>2</sub> levels than Method 1 both at 5 min (mean difference = 127,  $P < .0001$ ) and at 20 min (mean difference = 107,  $P < .0001$ ) while adjusting for group, side of operation, FEV<sub>1</sub>/VC ratio, and 2 Lung-Pre PaO<sub>2</sub>.

#### DISCUSSION

This study shows that the arterial oxygenation during OLV with CPAP to the ND-lung is dependant on the method by which the CPAP is applied. Since changes in oxygen consumption and cardiac output were unlikely in our patients,<sup>9</sup> the difference in arterial oxygenation during OLV was due to a difference in intra-pulmonary shunt. Thus, the method of CPAP application is a major determinant of shunt during OLV with CPAP to the ND-lung.

Method 1 application of CPAP was designed to mimic a common clinical situation. The initiation of OLV is a time of rapid physiologic changes. The anesthesiologist must assure adequate isolation and ventilation of one lung, assess oxygenation and compliance, and react quickly to any deficiency. Application of CPAP may be delayed and the ND-lung collapses to such an extent that usual maintenance levels of CPAP (5–10 cm) do not give adequate improvement in oxygenation. However, application of CPAP 5 cm to the fully inflated,

extremely compliant ND-lung results in a lung which stays well above its normal residual capacity and impedes surgery.

Method 2 was developed as a compromise between too much and too little collapse of the ND-lung. Pilot studies showed that a maintenance level of only 2 cm CPAP was often not enough to prevent gradual ongoing atelectasis in the ND-lung and subsequent deterioration in PaO<sub>2</sub> levels. In pilot studies, the combined use of CPAP 2 cm for 5 min followed by 5 cm had been found to allow the operative lung to deflate enough for easy surgical access and still result in adequate arterial oxygenation.

Facilitating surgery is the commonest reason for using OLV. There are other methods of treating or preventing hypoxemia during OLV, but all of these have inherent deficiencies. Intraoperative hypoxemia can be treated by re-expanding the ND-lung, but only at the cost of interrupting surgery. Application of positive end-expiratory pressure to the dependant lung is an unreliable treatment of hypoxemia in this situation.<sup>10</sup> Some slight improvement in PaO<sub>2</sub> values may be achieved by manipulation of the tidal volume of the dependant lung.<sup>11</sup> However, application of CPAP is recommended as the primary treatment<sup>12</sup> of hypoxemia during OLV.

The time course of PaO<sub>2</sub> changes beyond 25 min of OLV with CPAP has not been studied. Bindslev *et al.*,<sup>13</sup> in a study not using volatile anesthetic agents, reported that hypoxic pulmonary vasoconstriction (HPV) was

maximum after 15 min of OLV, and did not increase with subsequent hypoxic challenge. Rogers and Benumof<sup>14</sup> showed there was no significant difference in patients' PaO<sub>2</sub> values during OLV with or without a volatile agent. Merridew and Jones<sup>15</sup> found a similar lack of difference in oxygenation between anesthetic techniques with and without a volatile agent in a study of OLV with ND-lung CPAP. Benumof<sup>16</sup> feels that there would be only minimal redistribution of blood flow between the lungs after 30 min of OLV. For these reasons, it was decided to limit the study time of OLV with each method to 25 min.

It has previously been shown that the arterial oxygenation during OLV has a positive correlation with the degree of obstructive lung disease.<sup>11</sup> Since the patient population in this study had very little significant obstructive disease (mean FEV<sub>1</sub>/VC = 0.73 ± .09), the applicability of the results to patients with high degrees of obstructive disease is uncertain.

In conclusion, this study has shown that the method by which CPAP is applied to the ND-lung will effect the subsequent arterial oxygenation during OLV. It is possible to apply the CPAP in a controlled fashion that will reduce the risk of intraoperative hypoxemia without compromising surgical conditions.

The authors would like to thank Dr. J. Earl Wynands for his advice and review of the manuscript. They also thank Dr. Samy Suissa, Ph.D., for assistance with the statistics and Miss C. Colligan for her secretarial assistance.

#### REFERENCES

1. Read RC, Friday CD, Eason CN: Prospective study of the Robertshaw endobronchial catheter in thoracic surgery. *Ann Thorac Surg* 24:156-161, 1977
2. Tremper KK, Konchigeri HN, Cullen BF, Kapur PA, Thangathurai D, Percival C: Transcutaneous monitoring of oxygen tension during one-lung anesthesia. *J Thorac Cardiovasc Surg* 88:22-25, 1984
3. Torda TA, McCulloch CH, O'Brien HD, Wright JS, Horton DA:

- Pulmonary venous admixture during one-lung anesthesia, the effect of inhaled oxygen tension and respiration rate. *Anaesthesia* 29:272-279, 1974
4. Capan LM, Turndorf H, Patel C, Ramanathan S, Acinapura A, Chanlon J: Optimization of arterial oxygenation during one-lung anesthesia. *Anesth Analg* 59:847-851, 1980
  5. Obara H, Tanaka O, Hoshino Y, Kaetsu H, Maekawa N, Iwai S: One-lung ventilation, the effect of positive end expiratory pressure to the nondependent and dependant lung. *Anaesthesia* 41:1007-1010, 1986
  6. Godet G, Bertrand M, Coriat P, Baron JF, Rouby JJ, Kieffer E, Viars P: High frequency jet ventilation in patients undergoing resection of aortic aneurysm by thoracic incision (abstract). *ANESTHESIOLOGY* 65:A486, 1986
  7. Benumof JL: One-lung ventilation and hypoxic vasoconstriction: Implications for anaesthetic management. *Anesth Analg* 64:821-833, 1985
  8. Werner O, Malmkvist G, Beckman A, Stahle S, Nordstrom L: Gas exchange and hemodynamics during thoracotomy. *Br J Anaesth* 56:1343-1348, 1984
  9. Peltola K: Central haemodynamics and oxygenation during thoracic anaesthesia. *Acta Anaesthesiol Scand* 27(S77):1-44, 1983
  10. Tarhan S, Lundborg RO: Effects of increased expiratory pressure on blood gas tensions and pulmonary shunting with the use of the Carlens catheter. *Can Anesth Soc J* 17:4-11, 1970
  11. Katz JA, Laverne RG, Fairley HB, Thomas AN: Pulmonary oxygen exchange during endobronchial anesthesia: Effect of tidal volume and PEEP. *ANESTHESIOLOGY* 56:164-170, 1982
  12. Benumof JL, Alfery DD: Anesthesia for thoracic surgery, Anesthesia, 2nd edition. Edited by Miller RD. New York, Churchill-Livingston, 1986, pp 1371-1462
  13. Bindslev L, Jolin A, Hedenstierna G, Bachrendtz S, Santesson J: Hypoxic pulmonary vasoconstriction in the human lung: Effect of repeated hypoxic challenges during anesthesia. *ANESTHESIOLOGY* 62:621-625, 1985
  14. Rogers SN, Benumof JL: Halothane and isoflurane do not decrease PaO<sub>2</sub> during one-lung ventilation in intravenously anesthetized patients. *Anesth Analg* 64:946-954, 1985
  15. Merridew CG, Jones RDM: Nondependent lung CPAP (5 cm H<sub>2</sub>O) with oxygen during ketamine, halothane or isoflurane anesthesia and one-lung ventilation (abstract). *ANESTHESIOLOGY* 63:A567, 1985
  16. Benumof JL: Isoflurane anesthesia and arterial oxygenation during one-lung ventilation (editorial). *ANESTHESIOLOGY* 64:419-422, 1986
